# Supplementary material
Source: PubMed Central journal article supplement (PMC4047707)
Supplement: NIHMS581732-supplement-Supplementary.pdf [file NIHMS581732-supplement-Supplementary.pdf]

## Supplemental Information

### Behavioral Effects of Cocaine Mediated

### by Nitric Oxide-GAPDH Transcriptional Signaling

Risheng Xu, Anthony V. Serritella, Tanusree Sen, Justin M. Farook, Thomas W. Sedlak, Jay Baraban, Solomon H. Snyder, and Nilkantha Sen

#### Supplemental Inventory

##### Supplemental Figures

Figure S1. Dose dependent responses of CREB and p53 upon treatment with cocaine. Related with Figure 1.

Figure S2. Effects of D1 receptor antagonist on GAPDH nitrosylation . Related with Figure 3.

Figure S3. Effect of CGP3466B on locomotor sensitization of mice. Related with Figure 3.

Figure S4. Effect of MAO-B inhibitors on cocaine induced cell death of mice. Related with Figure 5.

#### SUPPLEMENTAL EXPERIMENTAL PROCEDURES

Chromatin immunoprecipitation (ChIP) assay  
Extraction of nuclear and cytoplasmic proteins

Co-immunoprecipitation  
Quantitative real-time PCR  
S-nitrosylation biotin switch assay  
TUNEL assay  
Lentiviral injections in mice brain

#### Supplemental References

# Supplementary Figure 1

A

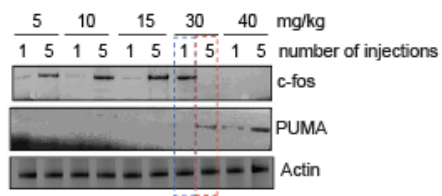

B

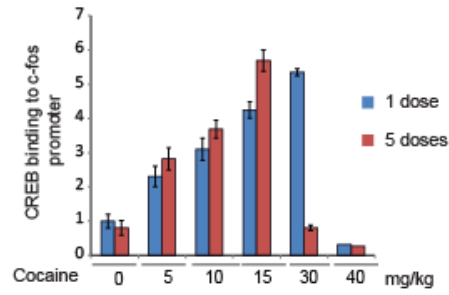

C

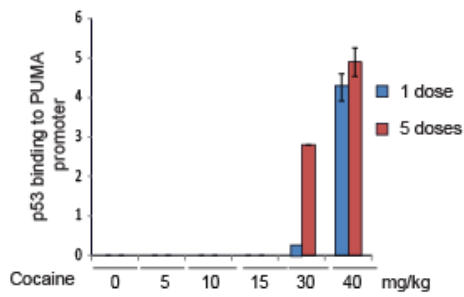

D

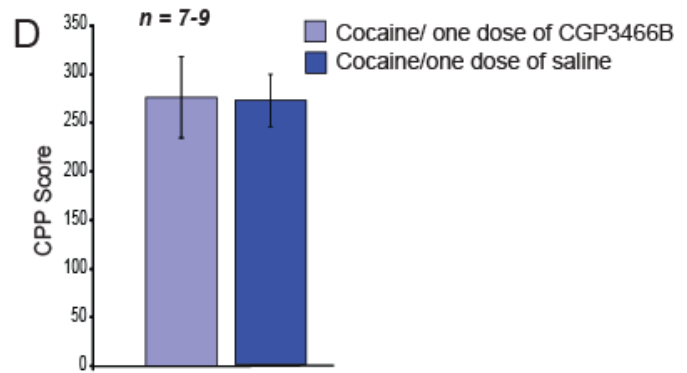

# Supplementary Figure 2

A

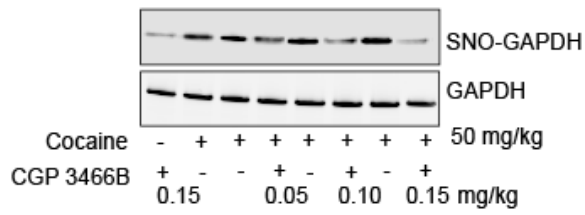

B

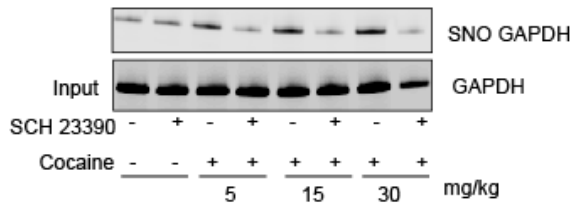

C

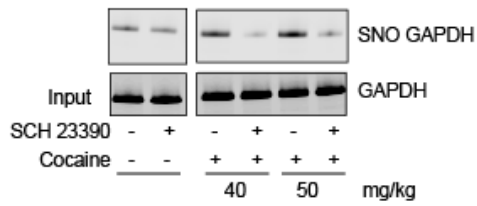

# Supplementary Figure 3

A

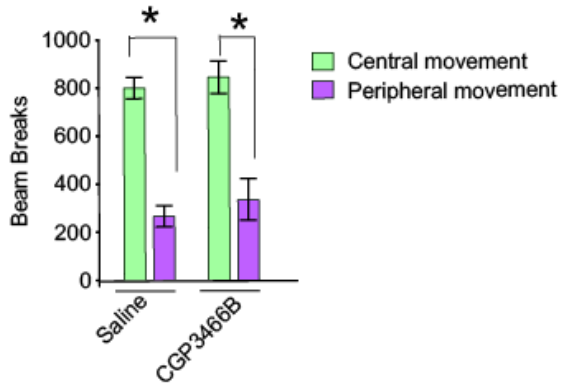

B

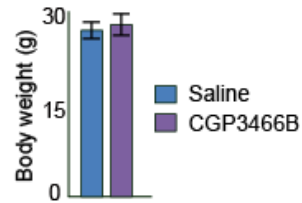

C

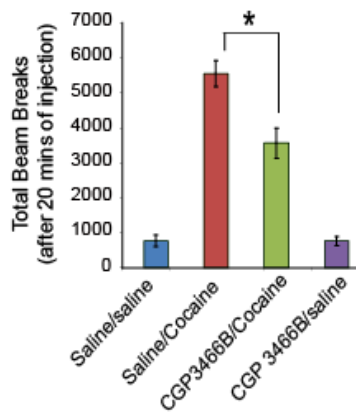

D

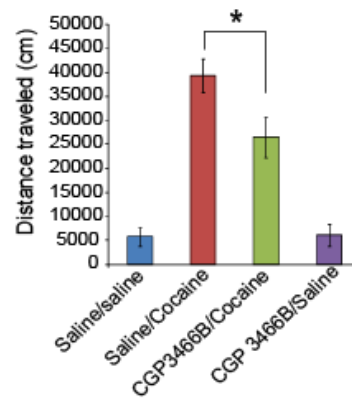

# Supplementary Figure 4

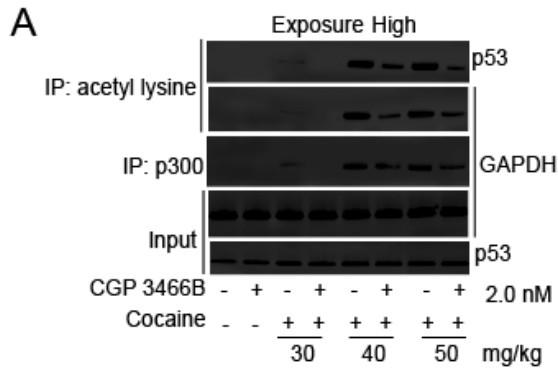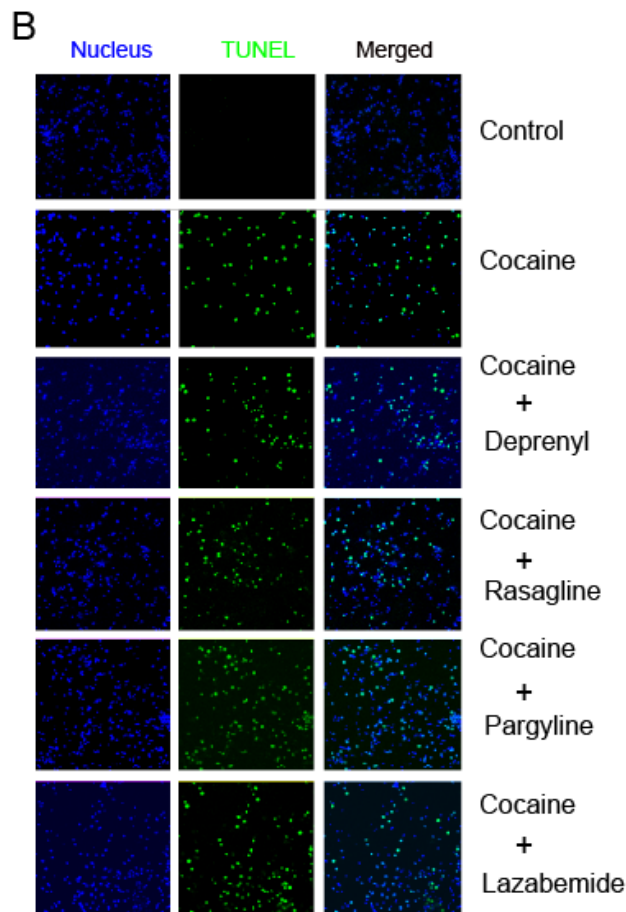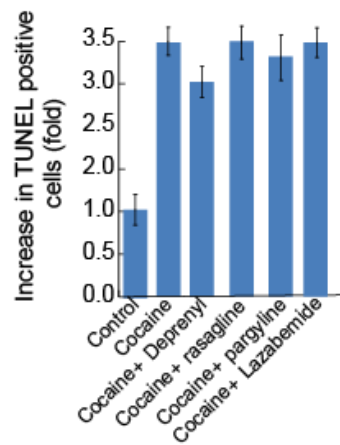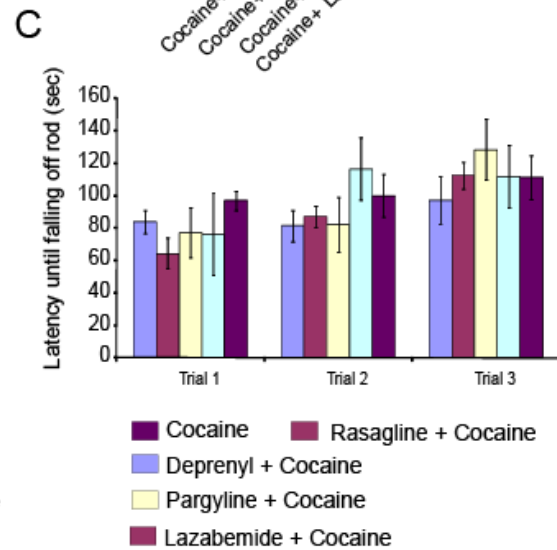

## Supplemental Figure Legends

### **Figure S1. Dose dependent responses of CREB and p53 upon treatment with cocaine.**

#### **Related with Figure 1.**

(A) Analysis of c-fos and PUMA levels with various doses of cocaine. (B) ChIP analysis to measure CREB binding to the c-fos promoter. (C) ChIP analysis to measure p53 binding to the PUMA promoter. (D) Treatment of cocaine-pretreated mice with one dose of CGP3466B on trial day does not alter the conditioned place preference score, which is calculated as the time spent in cocaine chamber minus time spent in saline/CGP3466B chamber.

### **Figure S2. Effects of D1 receptor antagonist on GAPDH nitrosylation . Related with Figure 3.**

(A) Analysis of nitrosylation of GAPDH (SNO-GAPDH) in mice treated with cocaine alone or with cocaine and various doses of CGP3466B. (B-C) The D1 receptor antagonist (SCH23390) prevents the stimulation of GAPDH nitrosylation by cocaine, establishing that cocaine's effects reflect dopamine acting at D1 receptors.

### **Figure S3. Effect of CGP3466B on locomotor sensitization of mice. Related with Figure 3.**

(A) CGP3466B has no effect on the distribution of central and peripheral movement by mice. Data were derived from open field test. \* $p < 0.01$ ,  $n = 12$ , one-way ANOVA, mean  $\pm$  SEM. (B) CGP3466B has no effect on body weight of mice. (C-D) Total beam breaks (C) and total distance traveled (D) were measured in mice treated with cocaine alone or with cocaine and CGP3466B treatment. \* $p < 0.01$ ,  $n = 12$ , one-way ANOVA, mean  $\pm$  SEM.

### **Figure S4. Effect of MAO-B inhibitors on cocaine induced cell death of mice. Related with Figure 5.**

(A) Acetylation of both GAPDH and p53 and interaction between p300-GAPDH were monitored through western blot analysis. High exposure blot is shown here. (B) Analysis of cell death in striatum of mice treated with cocaine alone or with cocaine along with deprenyl, rasagiline, lazabemide or pargyline. (C) Balance and coordination were measured by rotarod analysis following treatment with cocaine alone or with cocaine along with deprenyl, rasagiline, lazabemide or pargyline.

## **SUPPLEMENTAL EXPERIMENTAL PROCEDURES**

### **Chromatin immunoprecipitation (ChIP) assay**

This assay was performed as described previously (Enwright et al., 2010; Kumar et al., 2005; Tsankova et al., 2004). In brief, intact cells were treated with 2 mM disuccinimidyl glutarate (Pierce) to crosslink protein complexes, then were treated with formaldehyde to link protein to DNA covalently. Cells were lysed, the nucleoprotein complexes sonicated and the crosslinked DNA-protein complexes enriched by immunoprecipitation with specific antibodies. The retrieved complexes were analyzed by PCR amplification to detect and quantify specific DNA targets. For performing the ChIP assay using striatum section of brain we followed the protocol of Chromatin preparation from tissues for chromatin immunoprecipitation (ChIP), provided by Abcam. For real-time PCR we used Brilliant SYBR green master mix (Stratagene) according to the manufacturer's protocol.

### **Extraction of nuclear and cytoplasmic proteins**

Nuclear and cytoplasmic extracts were prepared using Biovision Nuclear/cytosol extraction kit according to the manufacturer's instructions.

### **Co-immunoprecipitation**

Striatum tissue were lysed in lysis buffer (50 mM Tris pH 7.4, 150 mM NaCl, 0.1% Chaps, 100  $\mu$ M deferoxamine and 1 mM EDTA) and homogenized by passing through a 26-gauge needle. Crude lysates were cleared of insoluble debris by centrifugation at 14,000g. IP buffer (50 mM Tris pH 7.4, 150 mM NaCl, 0.1% Chaps, 100  $\mu$ M deferoxamine, 1 mM EDTA and 0.1 mg/ml BSA) was added to 100  $\mu$ g of cell lysates to bring samples to a total volume of 1 ml. Anti-Siah and anti-SUV39H1 antibody and 30  $\mu$ l of protein G agarose were added and incubated on a rotator at 4 °C. The protein G agarose was washed four times with lysis buffer and quenched with 30  $\mu$ l of SDS sample buffer. Co-immunoprecipitates were resolved by SDS-PAGE and analyzed by western blotting with anti-GAPDH and anti-SUV39H1 antibodies.

### **Quantitative real-time PCR**

This assay was performed as described before (Nott et al., 2008). PCR reactions (25 $\mu$ l) contained 12.5 $\mu$ l of PCR Sybr Green mix (NEB) with 0.3 $\mu$ M primers. At the end of the 35 cycles of

amplification, a dissociation curve was performed in which Sybr Green was measured at 1°C intervals between 50°C and 100°C. Results were normalized using total input DNA and expressed as bound/Input (percentage).

### **S-nitrosylation biotin switch assay**

Primary neurons overexpressed with dopamine transporter (DAT) were treated with cocaine with or without treatment with deprenyl, rasagaline, lazabemide or pargyline for 16 hr. Then cells were lysed and lysates were used for biotin switch assay to detect nitrosylation of GAPDH (SNO-GAPDH). The assay was performed as described (Jaffrey et al., 2001). In brief, cells were lysed, and reduced cysteines blocked with 4 mM methyl methanethionsulphonate (MMTS). Subsequently, S-nitrosylated cysteines were reduced with 1 mM ascorbate and biotinylated with 1 mM Biotin-HPDP (Pierce, Rockford, IL). The biotinylated proteins were pulled down with streptavidin agarose and analyzed by western blotting.

### **TUNEL assay**

Primary neurons were grown on coverslips with a density of  $2 \times 10^5$  per 12-well. Cells were treated with deprenyl (2nM), rasagaline (10 μM), lazabemide (10μM) or pargyline (10μM) for 16 hr and cell death was measured by TUNEL assays using TUNEL enzyme (Roche) and TUNEL label (Roche) following the manufacturer's instructions (Kickstein et al., 2010). To analysis cell death induced by neurotoxic dose of cocaine, we used TUNEL apoptosis detection kit (Millipore) using manufacturer's protocol (Lathia et al., 2010). Positive nuclei were counted in 30 fields (×400) for each slide.

### **Lentiviral injections in mice brain**

The stereotaxic injections (David Kopf Instruments, Tujunga, CA; n=3 per group) were performed under pentobarbital anesthesia (45 mg/kg,i.p.) using a syringe (Hamilton, Reno, NV) with a 30 gauge blunt-tip needle (de Almeida et al., 2002). Lentiviral vectors expressing the wild-type GAPDH or mutant C150S GAPDH were injected in the left or the right striatum, respectively. The animal received 4 μl injections of lentiviral vectors in each side at the following coordinates: 1.0 and 0.0 rostral to bregma, 3.0 and 3.3 lateral tomid line, and 5.0 ventral from the skull surface, with the mouth bar set at 3.3. The viruses were injected at 0.2 μl/min by means of an automatic injector (Stoelting Co.), and the needle was left in place for 5



min. The skin was closed using a 6-0 Vicryl suture (Ethicon; Johnson & Johnson, Brussels, Belgium). Three animals were killed, and the brains processed for both immunofluorescence and western blot hybridization 10 days after injection to confirm expression of HA-GAPDH. Mice overexpressing either HA-GAPDH or HA-C150S GAPDH were treated with cocaine with both behavioral and neurotoxic doses as mentioned before. Then mice were sacrificed and striatum was isolated from each animal. Striatum lysates were used to perform various western blots and ChIP analyses.

**Statistical analysis.** Data are expressed as mean  $\pm$  standard error (SE). Statistical significance of differences between 2 groups was determined by unpaired two tailed t-test, and between 3 or more groups by a one-way analysis of variance (ANOVA), two-way ANOVA or an ANOVA with repeated measures followed by the Tukey-Kramer post-hoc correction for multiple comparisons.  $p < 0.05$  was regarded as statistically significant.

### Supplemental References

de Almeida, L.P., Ross, C.A., Zala, D., Aebischer, P., and Deglon, N. (2002). Lentiviral-mediated delivery of mutant huntingtin in the striatum of rats induces a selective neuropathology modulated by polyglutamine repeat size, huntingtin expression levels, and protein length. *The Journal of neuroscience : the official journal of the Society for Neuroscience* 22, 3473-3483.

Enwright, J.F., 3rd, Wald, M., Paddock, M., Hoffman, E., Arey, R., Edwards, S., Spencer, S., Nestler, E.J., and McClung, C.A. (2010). DeltaFosB indirectly regulates Cck promoter activity. *Brain Res* 1329, 10-20.

Jaffrey, S.R., Erdjument-Bromage, H., Ferris, C.D., Tempst, P., and Snyder, S.H. (2001). Protein S-nitrosylation: a physiological signal for neuronal nitric oxide. *Nature cell biology* 3, 193-197.

Kickstein, E., Krauss, S., Thornhill, P., Rutschow, D., Zeller, R., Sharkey, J., Williamson, R., Fuchs, M., Kohler, A., Glossmann, H., *et al.* (2010). Biguanide metformin acts on tau phosphorylation via mTOR/protein phosphatase 2A (PP2A) signaling. *Proc Natl Acad Sci U S A* 107, 21830-21835.

Kumar, A., Choi, K.H., Renthal, W., Tsankova, N.M., Theobald, D.E., Truong, H.T., Russo, S.J., Laplant, Q., Sasaki, T.S., Whistler, K.N., *et al.* (2005). Chromatin remodeling is a key mechanism underlying cocaine-induced plasticity in striatum. *Neuron* 48, 303-314.

Lathia, J.D., Gallagher, J., Heddleston, J.M., Wang, J., Eyler, C.E., Macswords, J., Wu, Q., Vasanji, A., McLendon, R.E., Hjelmeland, A.B., *et al.* (2010). Integrin alpha 6 regulates glioblastoma stem cells. *Cell stem cell* 6, 421-432.

Nott, A., Watson, P.M., Robinson, J.D., Crepaldi, L., and Riccio, A. (2008). S-Nitrosylation of histone deacetylase 2 induces chromatin remodelling in neurons. *Nature* 455, 411-415.

Tsankova, N.M., Kumar, A., and Nestler, E.J. (2004). Histone modifications at gene promoter regions in rat hippocampus after acute and chronic electroconvulsive seizures. *J Neurosci* 24, 5603-5610.
